# Supplementary material for: Global, regional, and national burden of neck pain in the general population, 1990-2017: systematic analysis of the Global Burden of Disease Study 2017
Source: PubMed Central journal article supplement — BMJ. 2020 Mar 26;368:m791. doi: 10.1136/bmj.m791 (PMC7249252; doi:10.1136/bmj.m791), 2020-03-26
Supplement: safs053414.wf1.pdf [file safs053414.wf1.pdf]

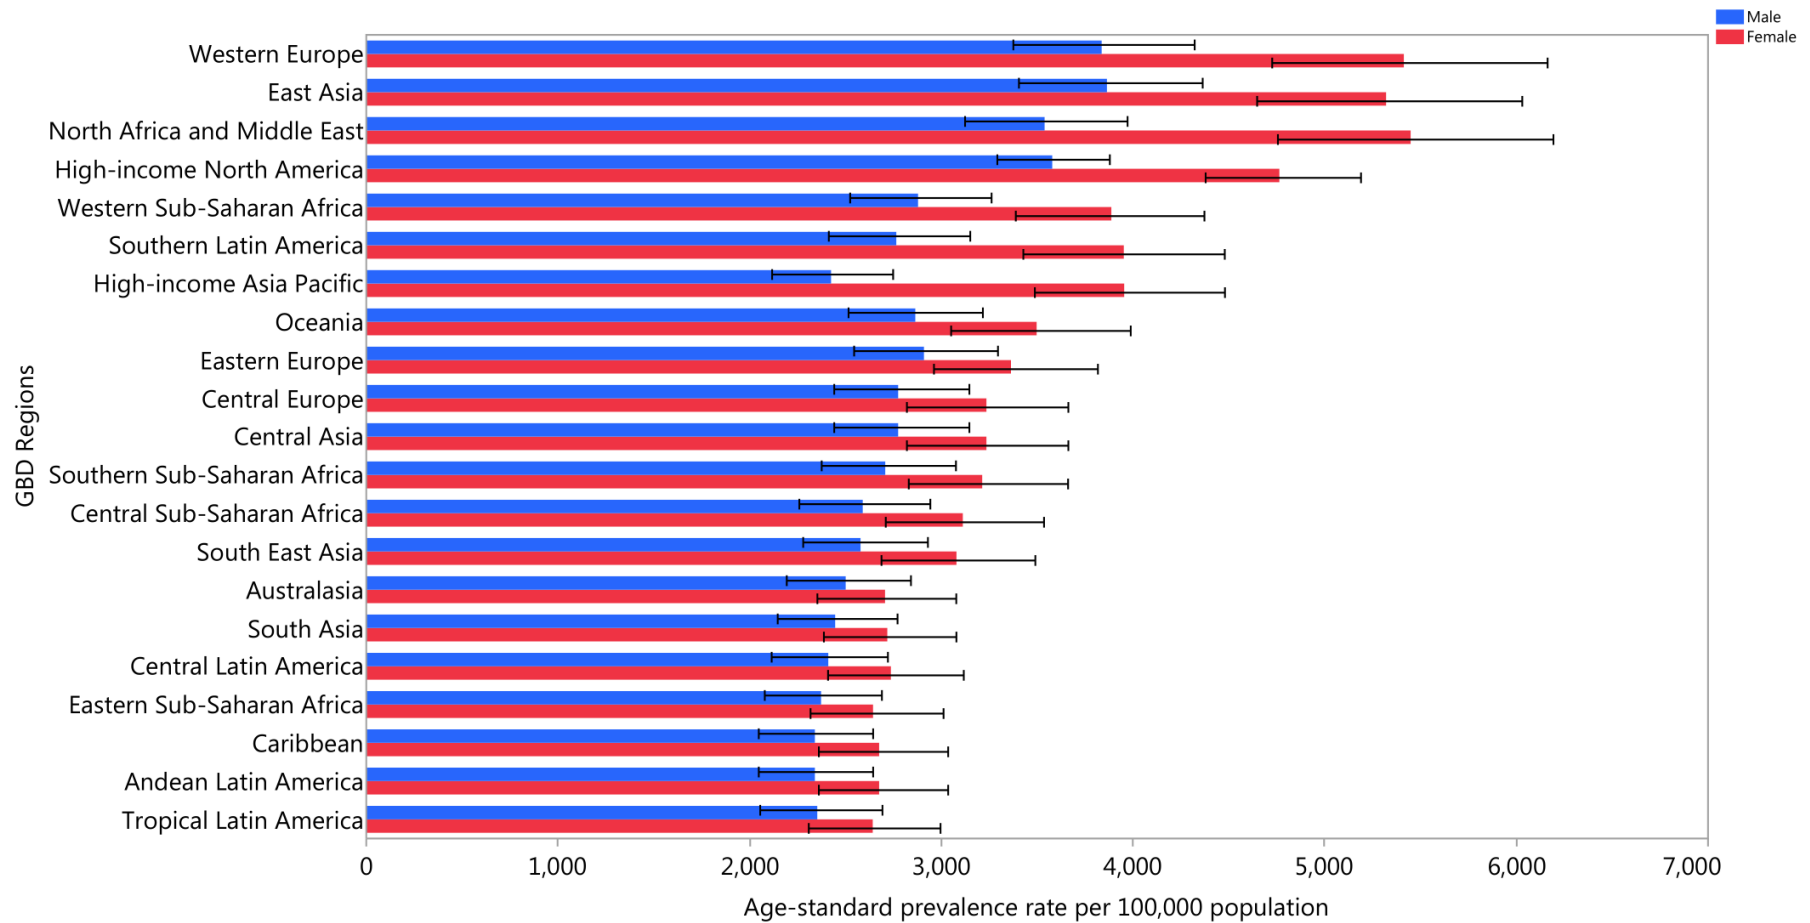

Figure S1: The age-standardised point prevalence of neck pain in 2017 for 21 Global Burden of Disease regions by sex. (Generated from data available from <http://ghdx.healthdata.org/gbd-results-tool>)

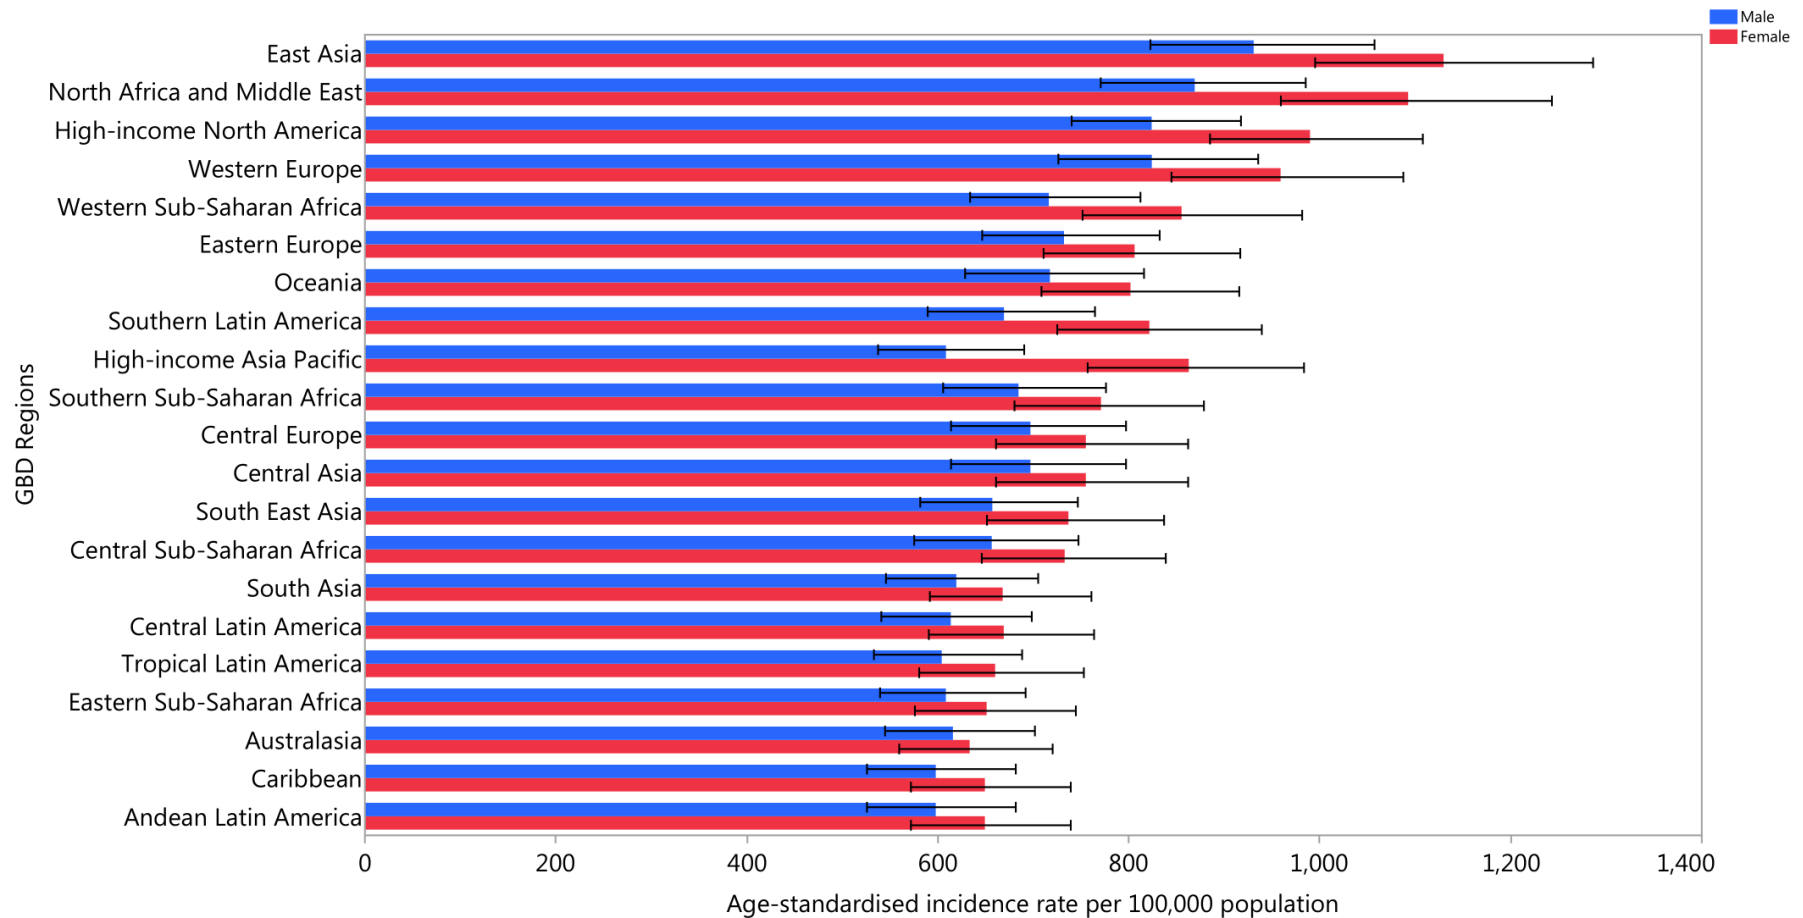

Figure S2: The age-standardised annual incidence rates of neck pain in 2017 for 21 Global Burden of Disease regions by sex. (Generated from data available from <http://ghdx.healthdata.org/gbd-results-tool>)

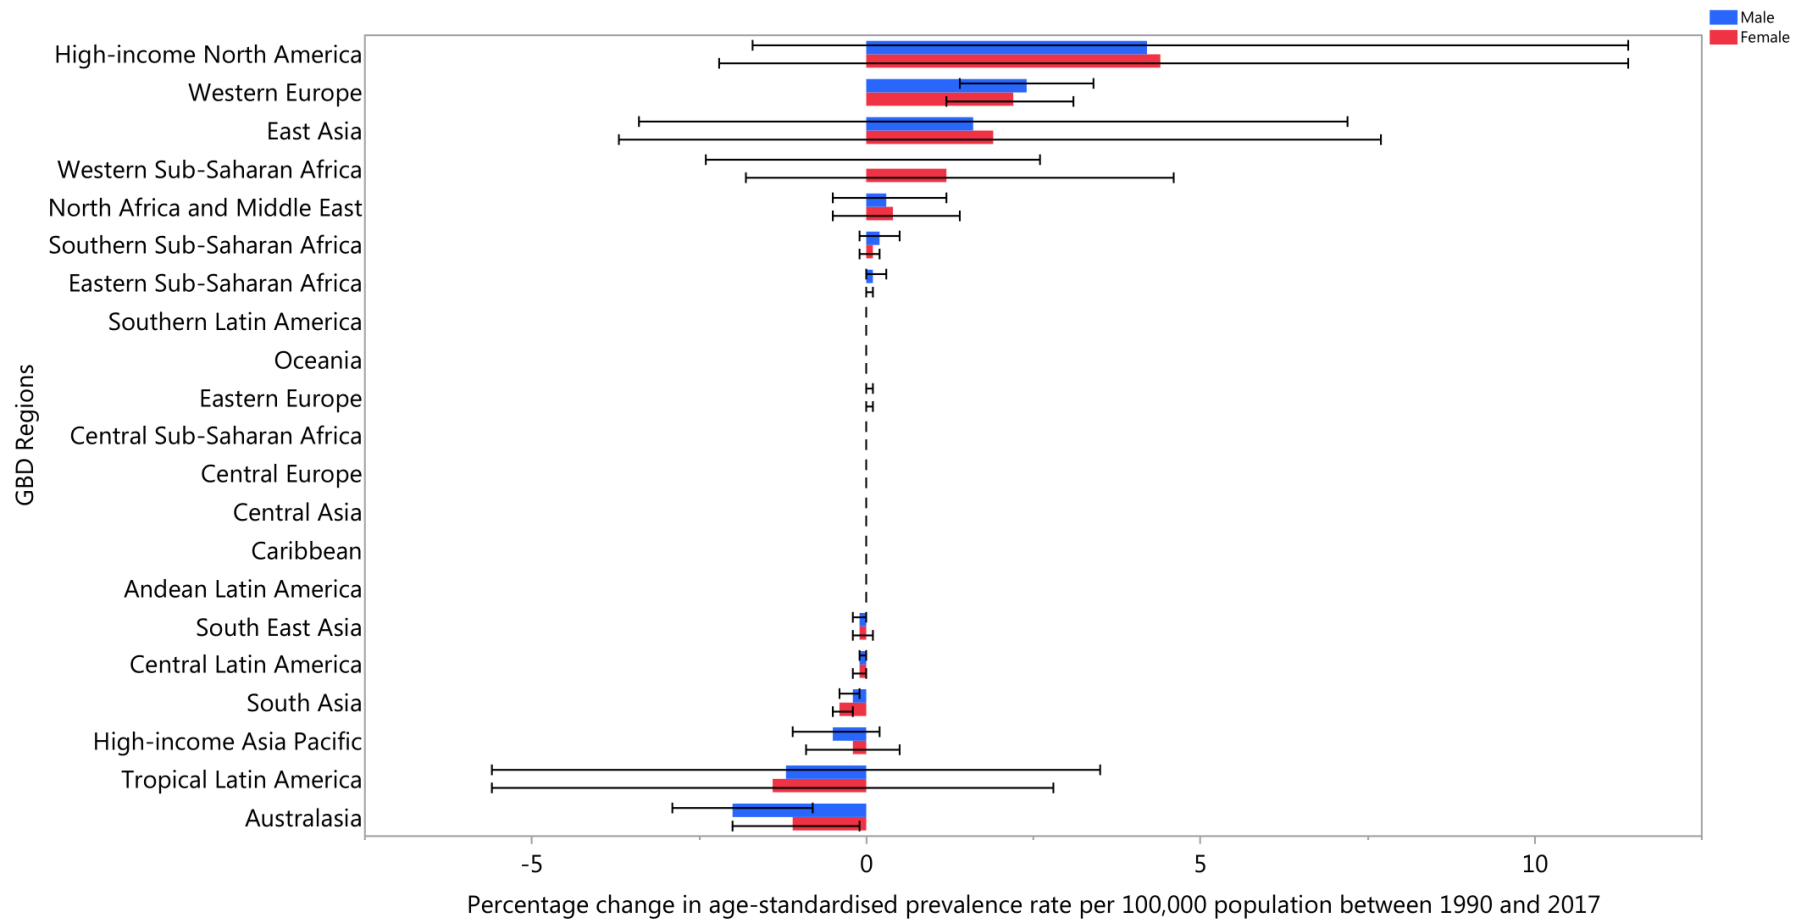

Figure S3: The percentage change in age-standardised point prevalence of neck pain from 1990 to 2017 for 21 Global Burden of Disease regions by sex. (Generated from data available from <http://ghdx.healthdata.org/gbd-results-tool>)

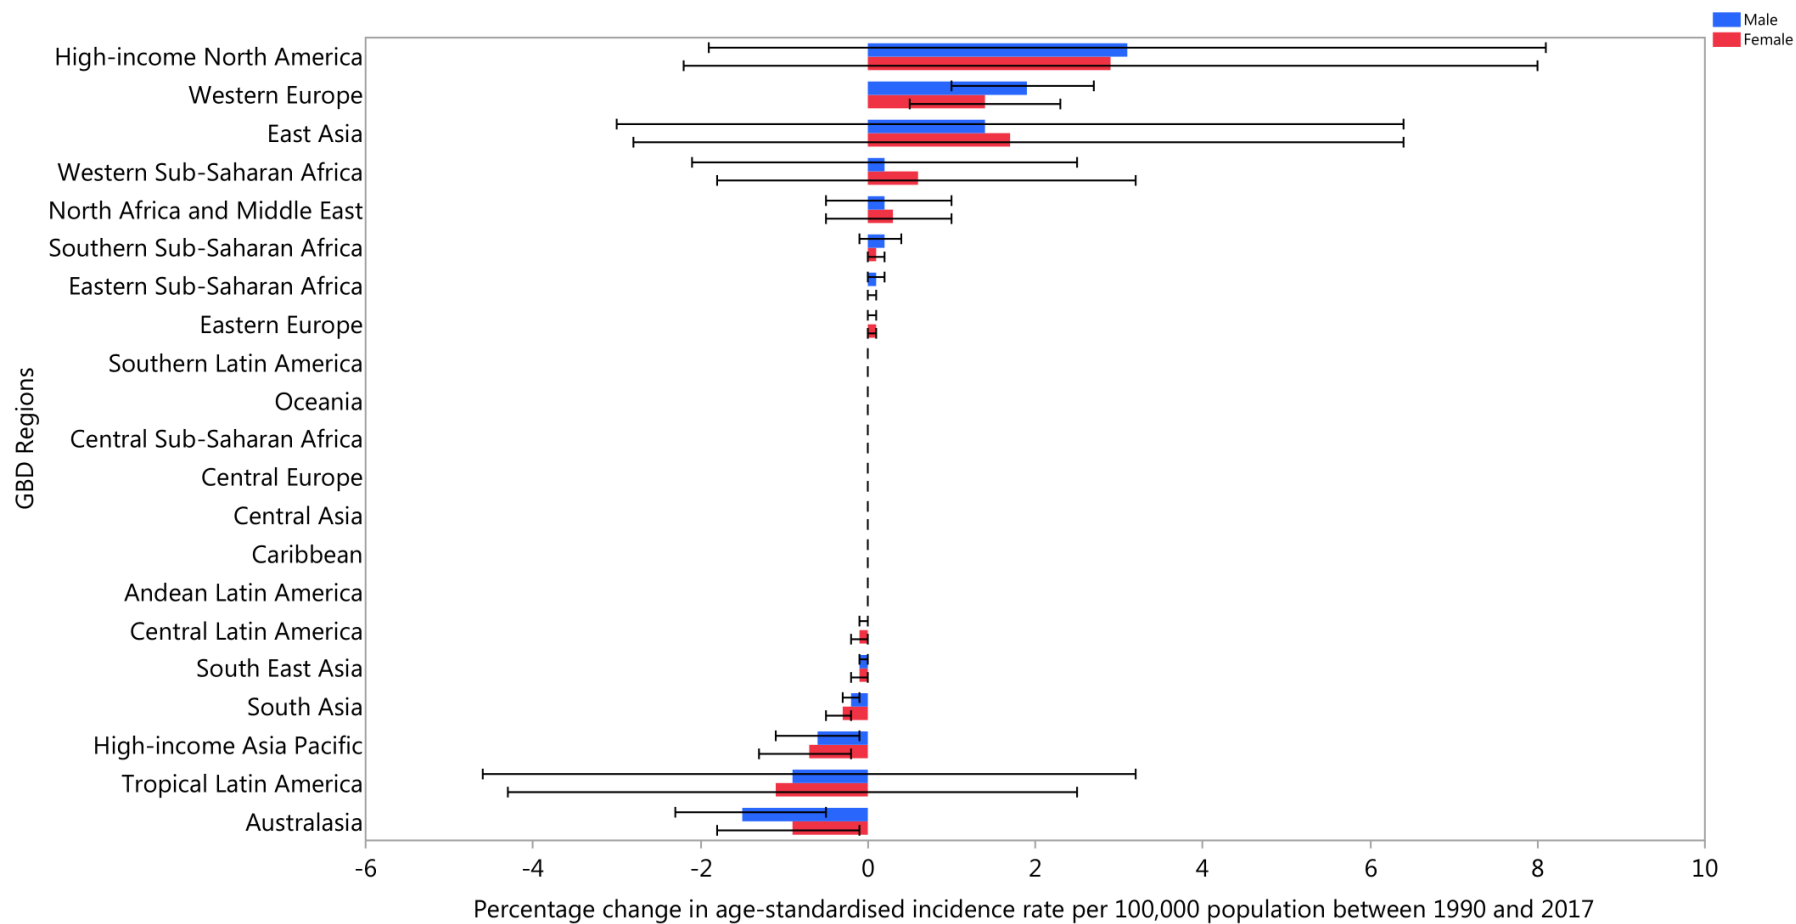

Figure S4: The percentage change in age-standardised annual incidence rates of neck pain from 1990 to 2017 for 21 Global Burden of Disease regions by sex. (Generated from data available from <http://ghdx.healthdata.org/gbd-results-tool>)

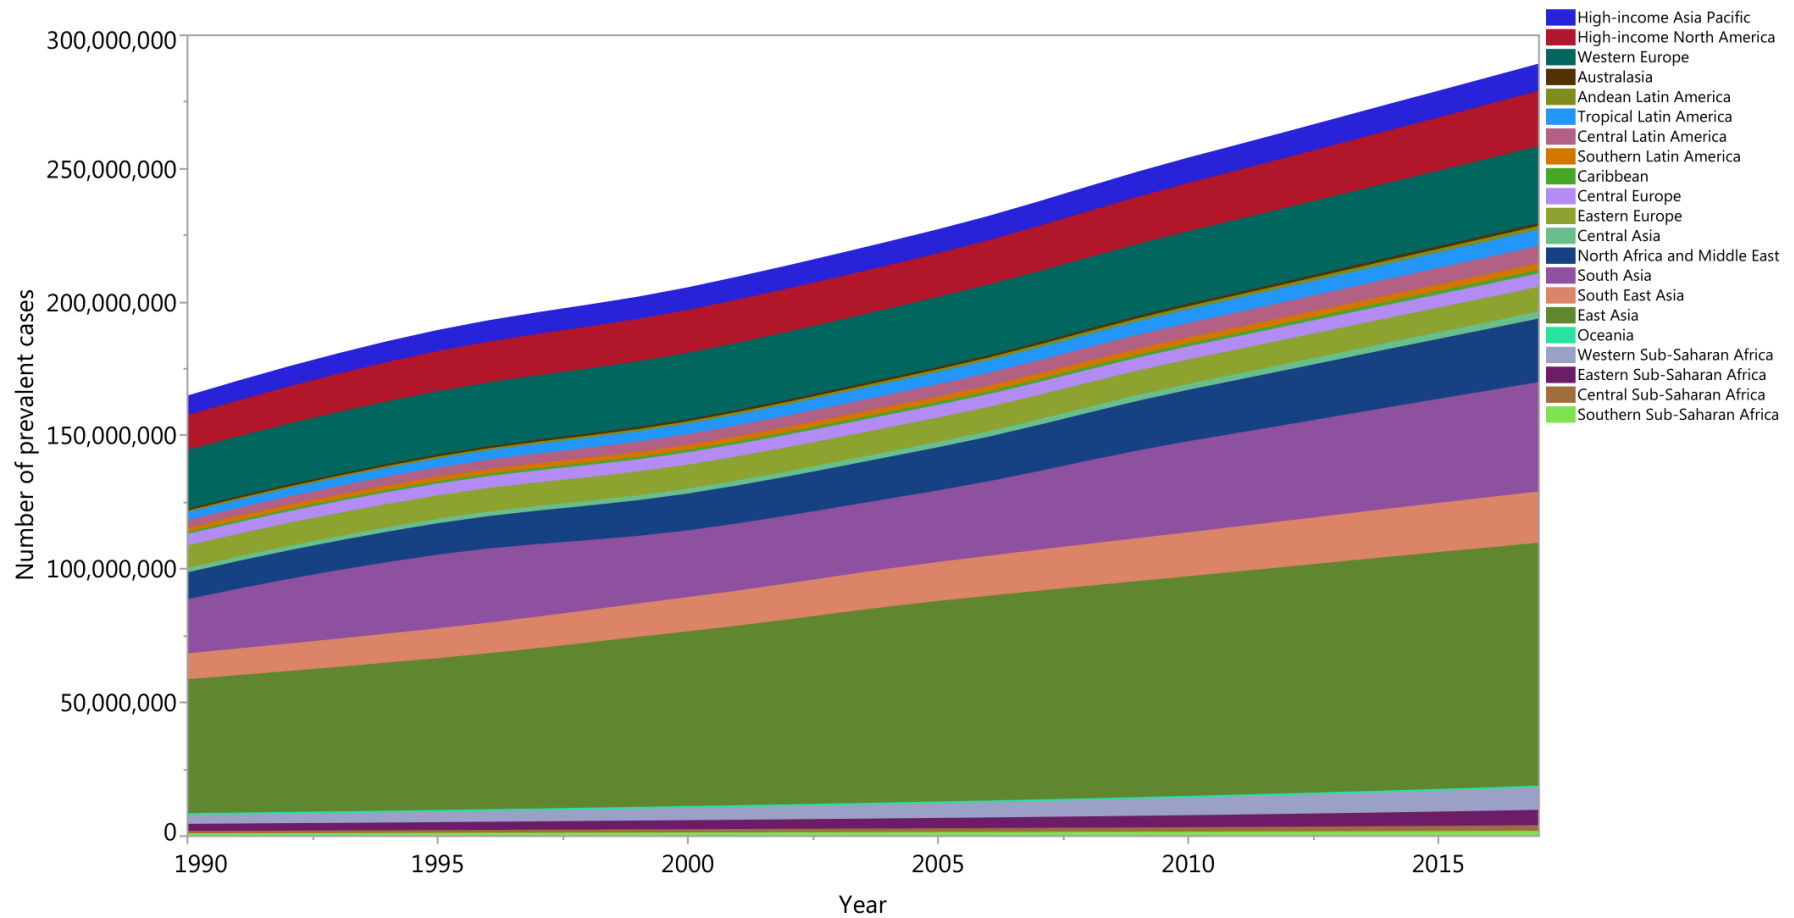

Figure S5: Number of prevalent cases of neck pain from 1990 to 2017 for 21 Global Burden of Disease regions. (Generated from data available from <http://ghdx.healthdata.org/gbd-results-tool>)

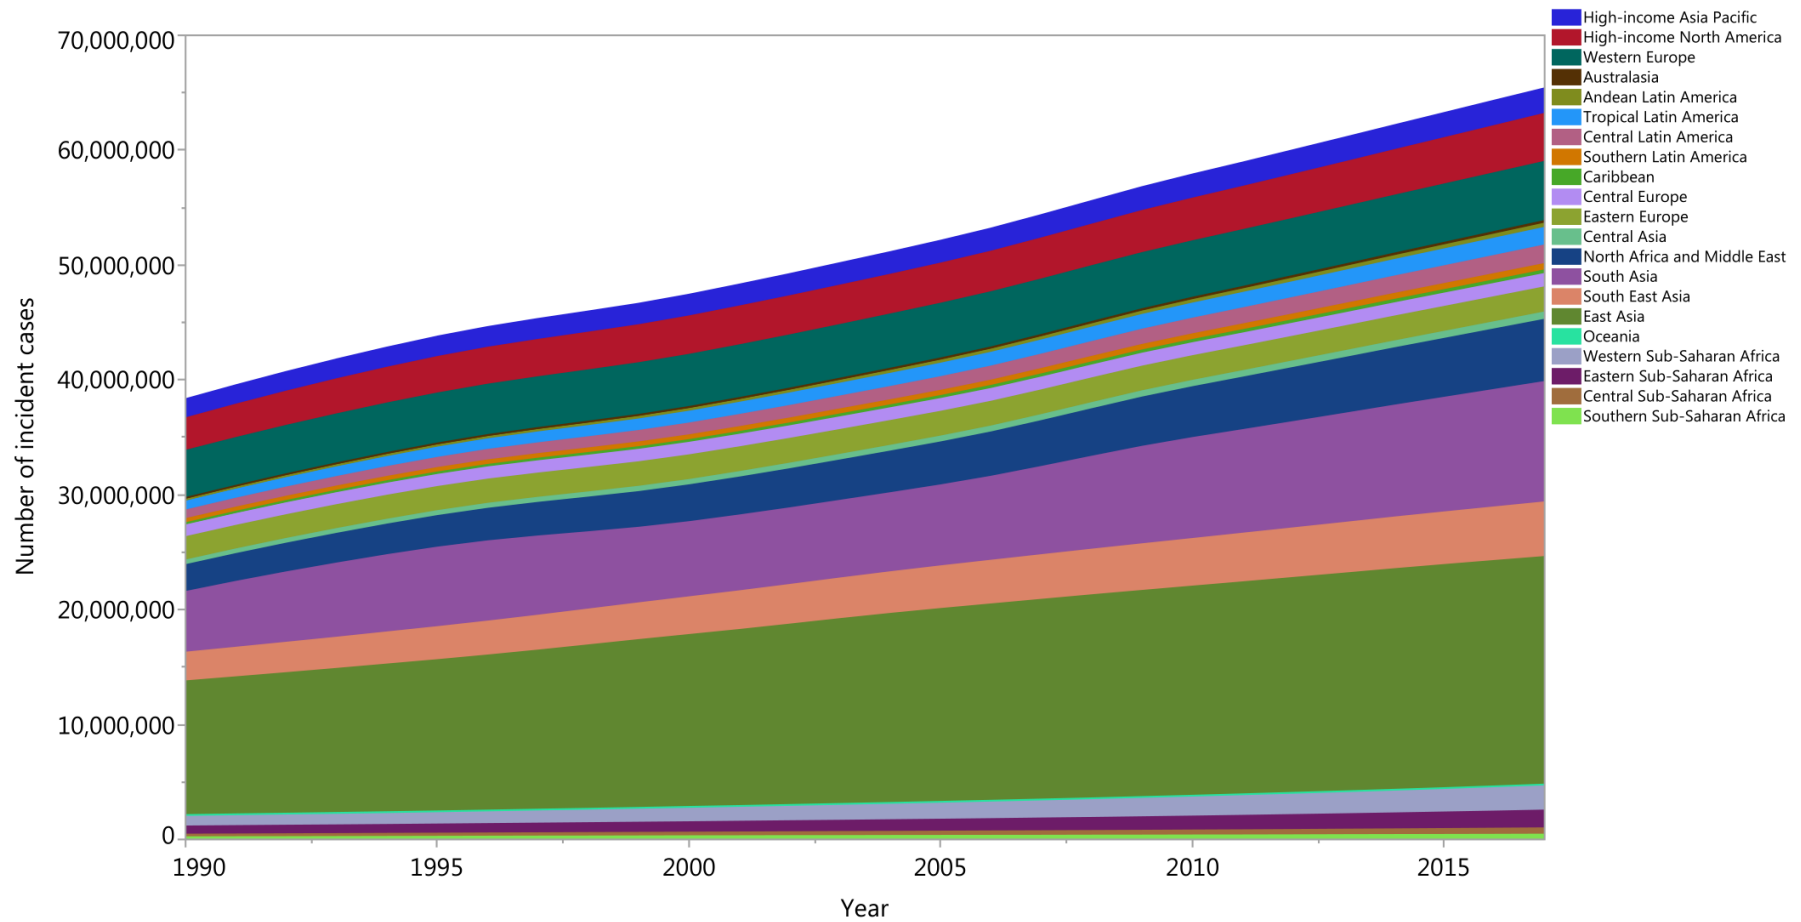

Figure S6: Number of incident cases of neck pain from 1990 to 2017 for 21 Global Burden of Disease regions. (Generated from data available from <http://ghdx.healthdata.org/gbd-results-tool>)

## Age-standardised YLD rate (per 100,000), both sexes, 2017

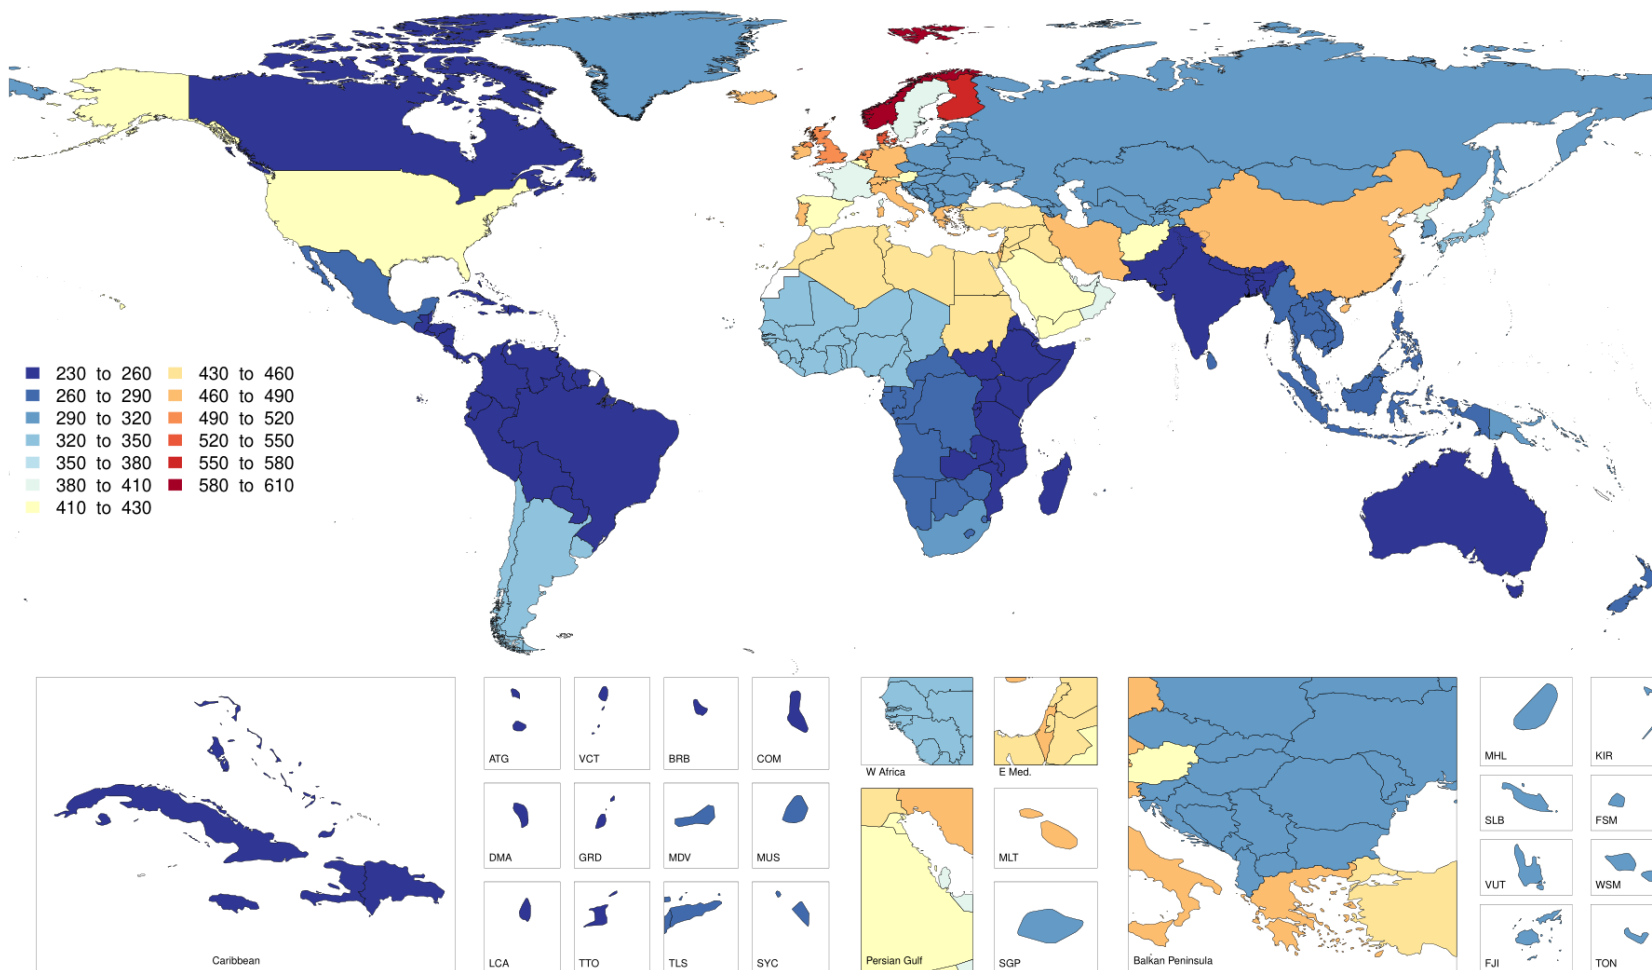

Figure S7: Age-standardised YLD rate of neck pain per 100,000 population in 2017, by country. ATG=Antigua and Barbuda, VCT=Saint Vincent and the Grenadines, BRB=Barbados, COM=Comoros, DMA=Dominica, GRD=Grenada, MDV=Maldives, MUS=Mauritius, LCA=Saint Lucia, TTO=Trinidad and Tobago, TLS=Timor-Leste, SYC=Seychelles, MLT=Malta, SGP=Singapore, MHL=Marshall Islands, KIR=Kiribati, SLB=Solomon Islands, FSM=Federated States of Micronesia, VUT=Vanuatu, WSM=Samoa, FJI=Fiji, TON=Tonga. YLD=years lived with disability. (Generated from data available from <http://ghdx.healthdata.org/gbd-results-tool>)



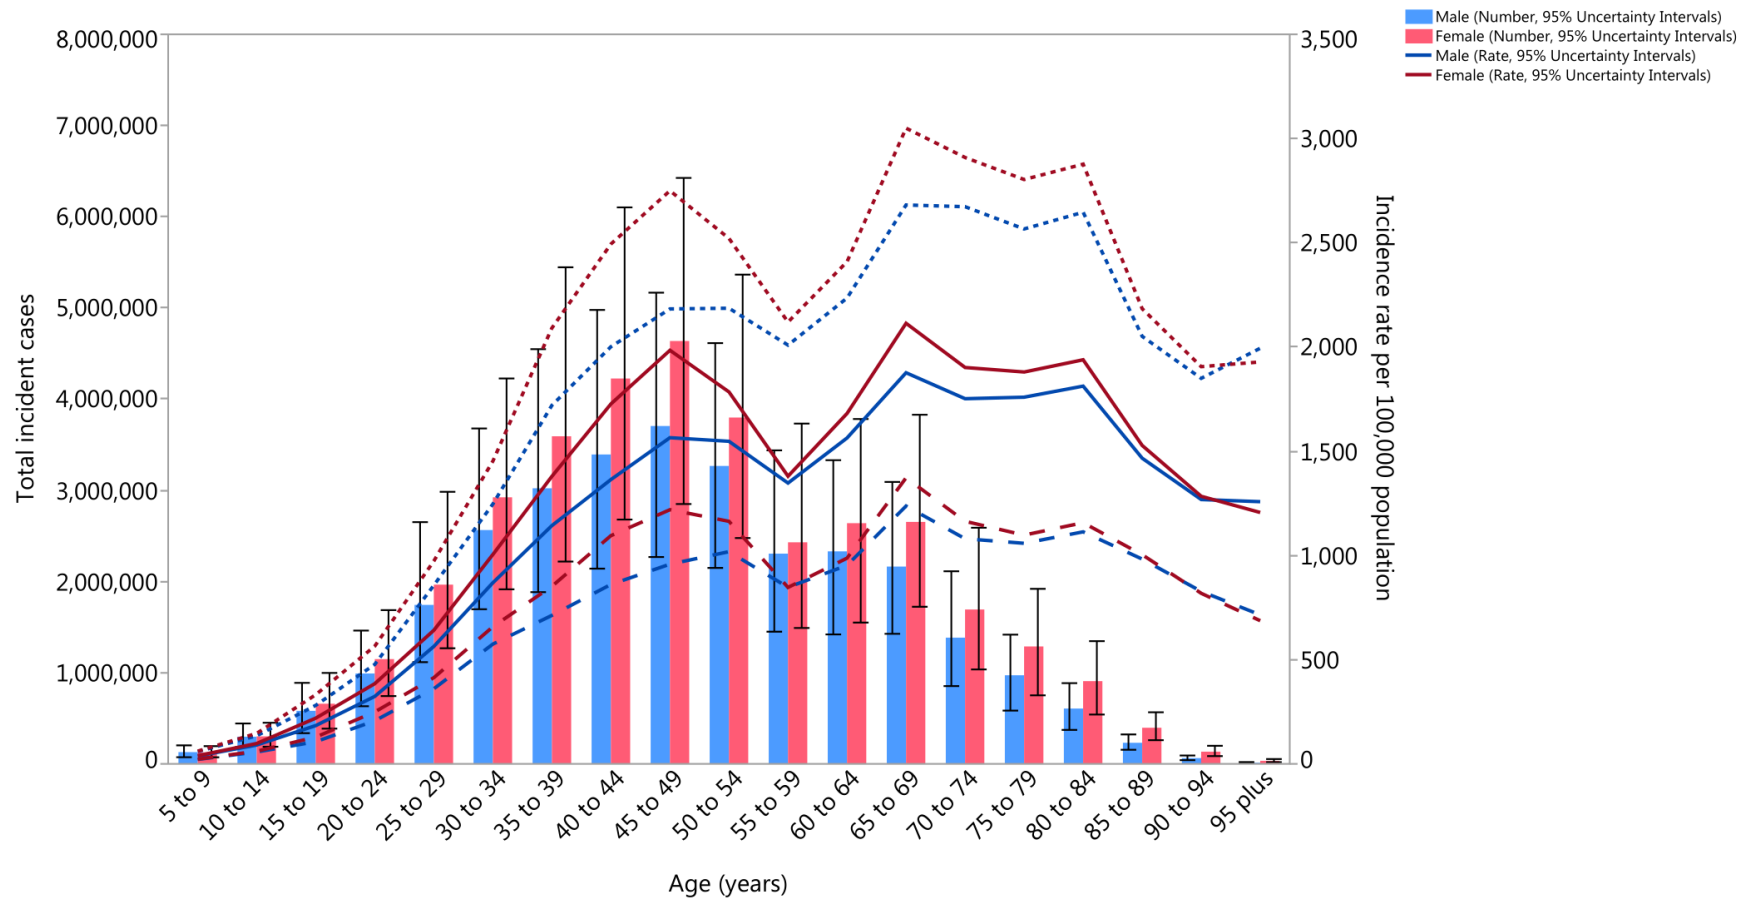

Figure S8: Global number of incident cases and age-standardised annual incidence rate of neck pain per 100,000 population by age and sex, 2017; Dotted and dashed lines indicate 95% upper and lower uncertainty intervals, respectively. (Generated from data available from <http://ghdx.healthdata.org/gbd-results-tool>)

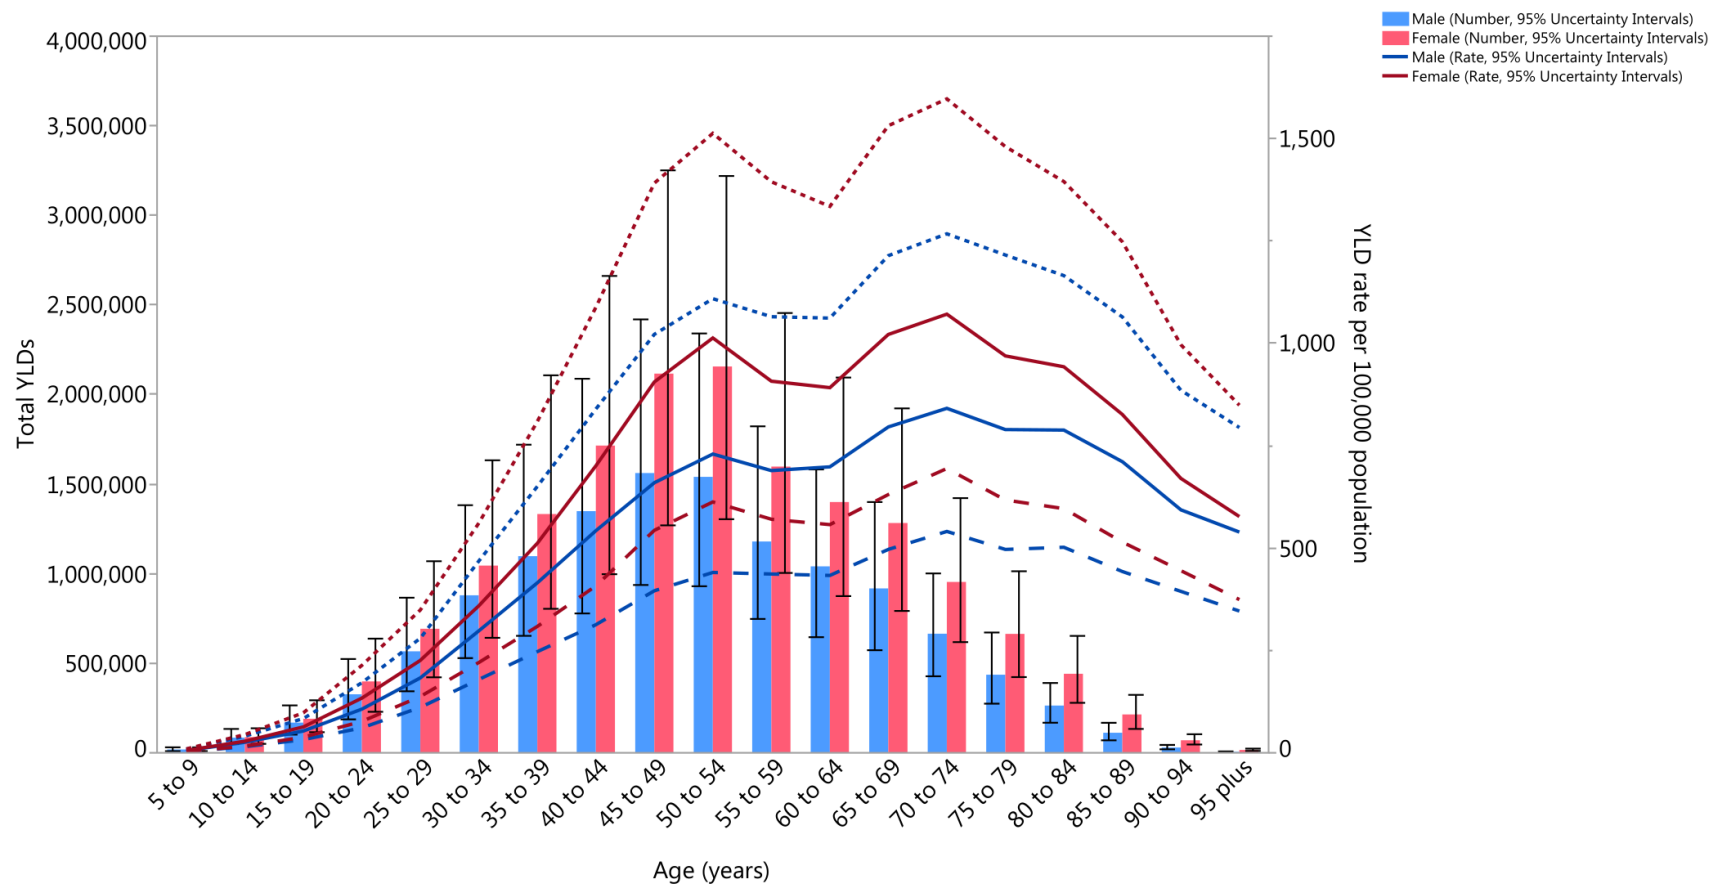

Figure S9: Global number of YLDs and age-standardised YLD rate of neck pain per 100,000 population by age and sex, 2017; Dotted and dashed lines indicate 95% upper and lower uncertainty intervals, respectively. YLD=years lived with disability. (Generated from data available from <http://ghdx.healthdata.org/gbd-results-tool>)
